# Supplementary material
Source: PubMed Central journal article supplement (PMC5321570)
Supplement: NIHMS834611-supplement-7.pdf [file NIHMS834611-supplement-7.pdf]

A

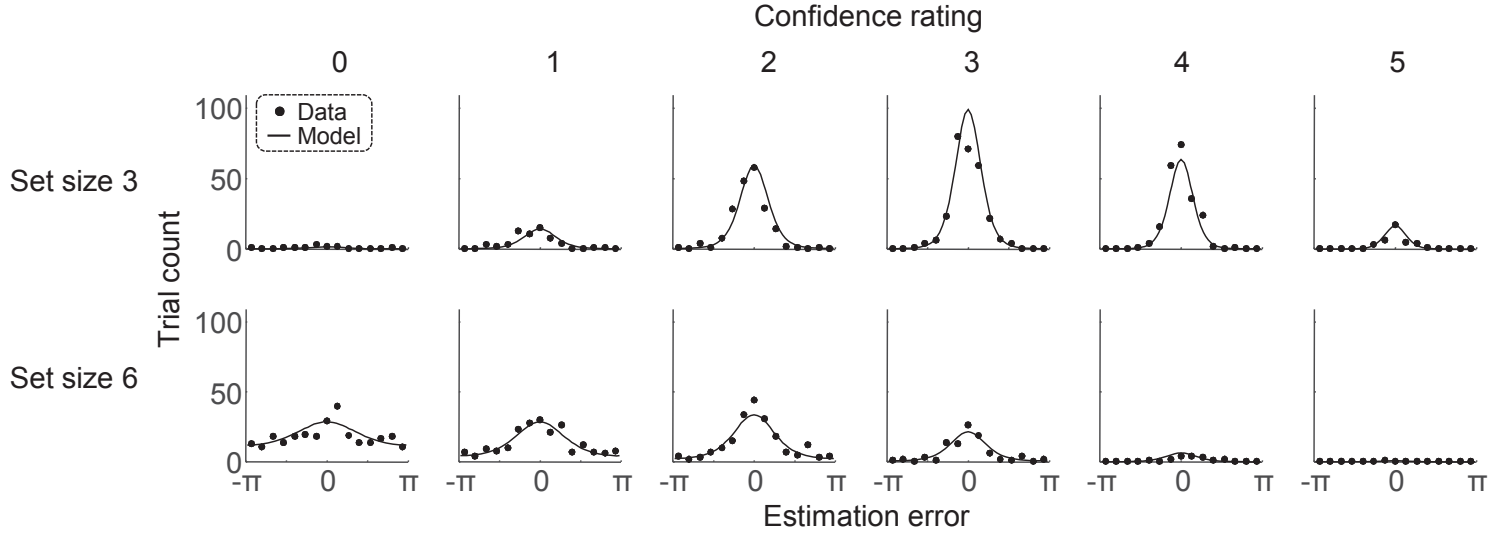

B

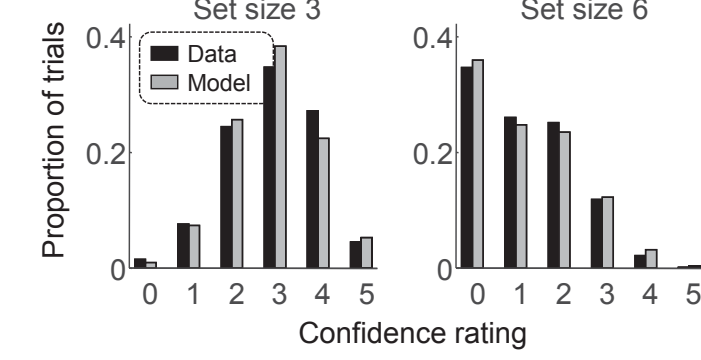

C

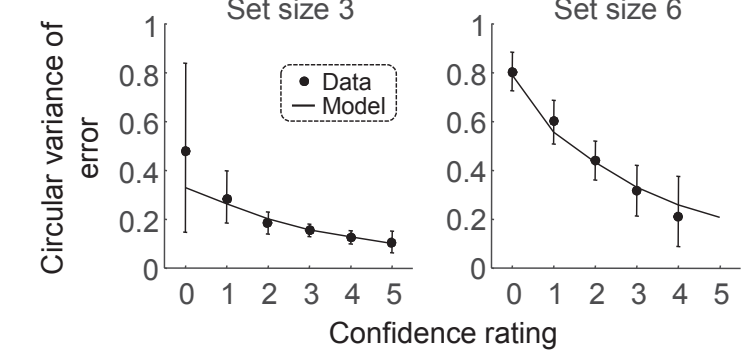

**Figure S7. Model fit to data of subject S6.** (A) Histogram of estimation errors, split by confidence rating (columns) and set size (rows). (B) Distribution of confidence ratings, split by set size. (C) Circular variance of the estimation error as a function of confidence rating, split by set size. Error bars indicate bootstrapped 95% confidence intervals.
